# Supplementary material for: The regulation of reaction processes and rate-limiting steps for efficient photocatalytic CO2 reduction into methane over the tailored facets of TiO2
Source: Royal Society of Chemistry journal article supplement (doi:10.1039/c8cy02457j), 2019-01-01
Supplement: c8cy02457j1.pdf [file c8cy02457j1.pdf]

**Electronic Supplementary Information for**

**The regulation of reaction processes and rate-limiting steps for**

**efficient photocatalytic CO<sub>2</sub> reduction into methane over the tailored**

**facets of TiO<sub>2</sub>**

Ping Yan,<sup>a</sup> Jun Long,<sup>a</sup> Kanglu Li,<sup>a</sup> Shandong Yuan,<sup>a, b</sup> Yongjun Liu <sup>a, b\*</sup> and Yaoqiang Chen<sup>a</sup>

a. Institute of New Energy and Low Carbon Technology, College of Chemistry, College of Architecture and Environment, Sichuan University, P. R. China.

b. National Engineering Research Center for Flue Gas Desulfurization, P. R. China.

\*Corresponding authors:

Prof. Yongjun Liu (liuyj@scu.edu.cn)

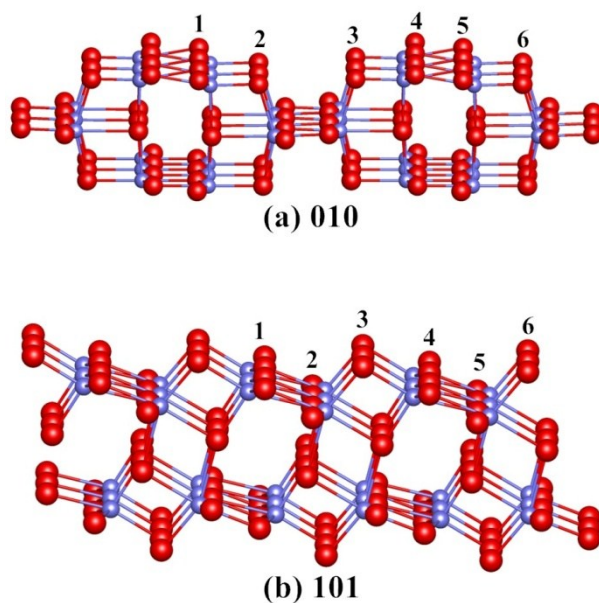

**Figure S1.** Relaxed structures of anatase  $\text{TiO}_2$  models for  $\{010\}$  (a) and  $\{101\}$  (b) facets. The royal blue and red balls stand for titanium and oxygen atoms, respectively.

**Table S1** Summary of charge transfer of adsorbed  $\text{CO}_2$  on anatase  $\text{TiO}_2$   $\{010\}$  and  $\{101\}$  facets.

| Populated electrons/ $\Delta q$ , e |           |           |
|-------------------------------------|-----------|-----------|
| structures                          | $\{010\}$ | $\{101\}$ |
| Atom species                        |           |           |
| C                                   | 2.09      | 2.11      |
| O1                                  | -0.99     | -1.01     |
| O2                                  | -1.09     | -1.08     |
| Ti*                                 | 2.19      | 2.18      |

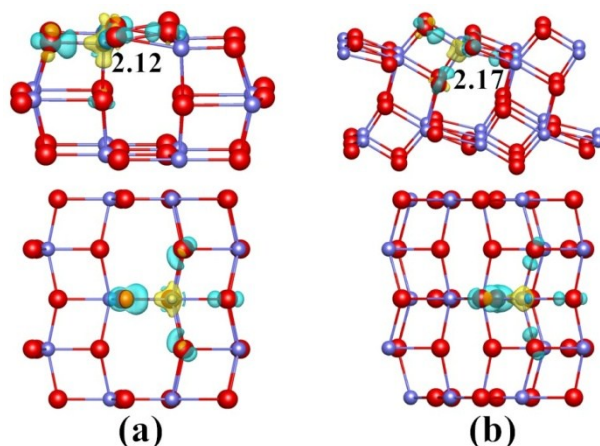

**Figure S2.** The charge difference density and Bader analysis for Ti atoms on anatase TiO<sub>2</sub> {010} facet (a) and {101} facet (b). The isosurfaces are set to 0.17 e Å<sup>-1</sup>. All the Bader value are e, where a positive value denotes that it loses electrons. Yellow (blue) region means electron depletion (accumulation). The royal blue and red balls stand for titanium and oxygen atoms, respectively. It shows that more electrons can be transferred from the Ti atom to the other atoms for anatase {101} facet than {010} facet, which is agree with the result of CO<sub>2</sub> adsorption indicating electron transportation on the {101} facet is stronger than {010} facet.

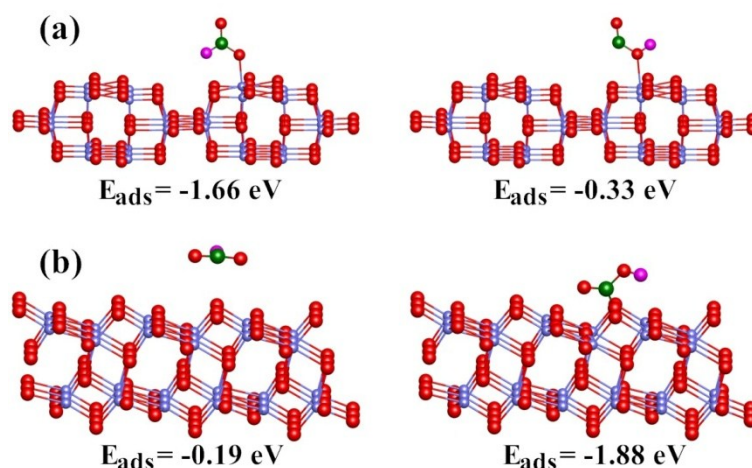

**Figure S3.** The most stable intermediate for the 1H step of CO<sub>2</sub> reduction to form CH<sub>4</sub> over anatase TiO<sub>2</sub> {010} (a) and {101} (b) facets.

### Formation of CH<sub>4</sub>

On the TiO<sub>2</sub> {010} facet, the overall formula of formation of CH<sub>4</sub> on can be depicted

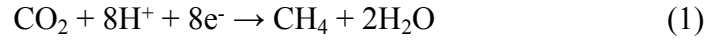

The pathway following these eight elementary steps:

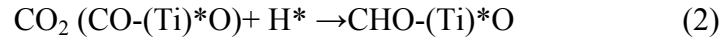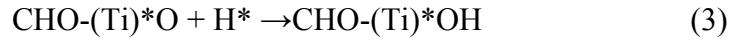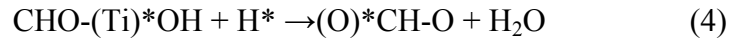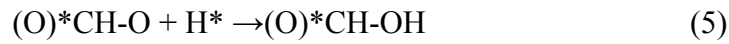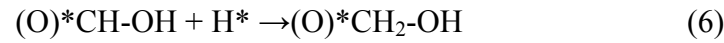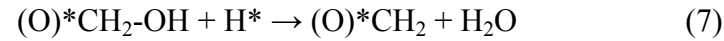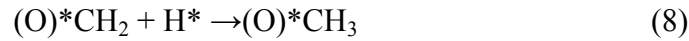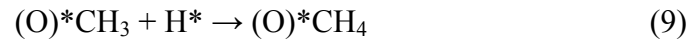

On the anatase TiO<sub>2</sub> {010} facet, the overall formula of formation of CH<sub>4</sub> can be written

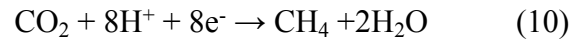

The detailed reaction pathways of the generation of CH<sub>4</sub> through the eight elementary steps:

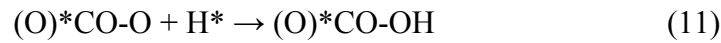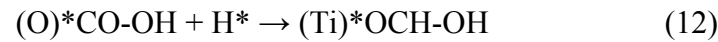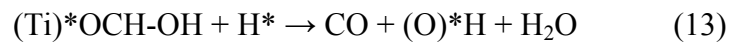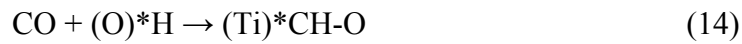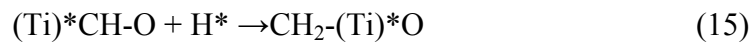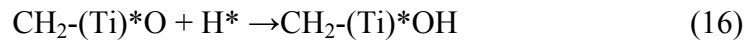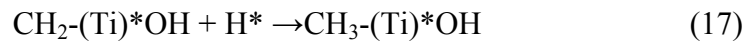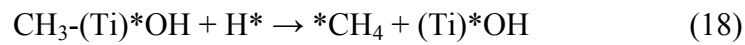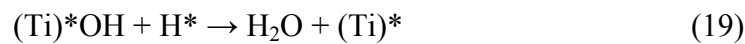

(a) 1H

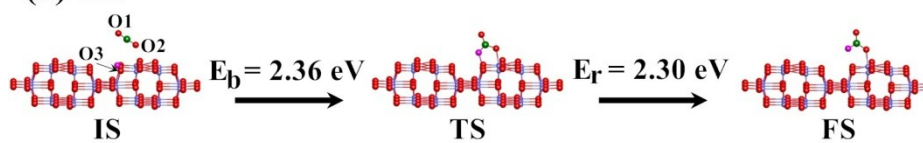

(b) 2H

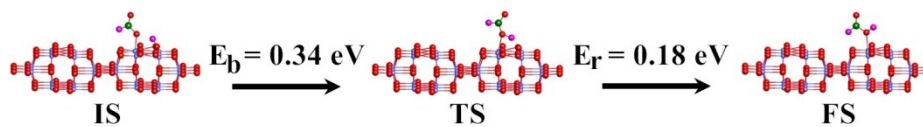

(c) 3H

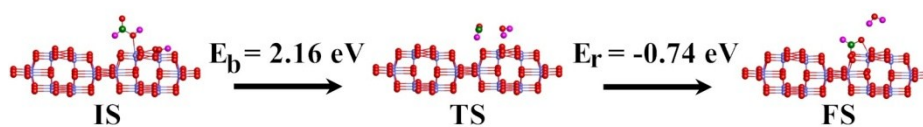

(d) 4H

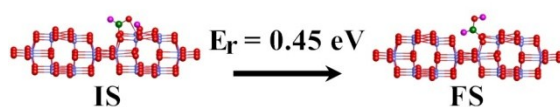

(e) 5H

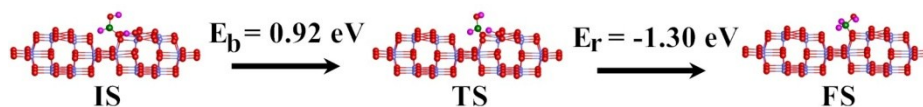

(f) 6H

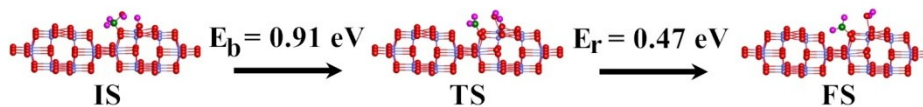

(g) 7H

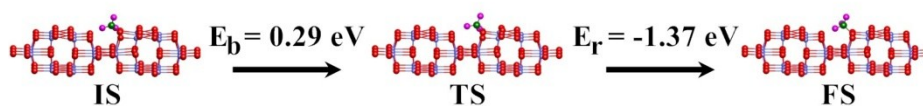

(h) 8H

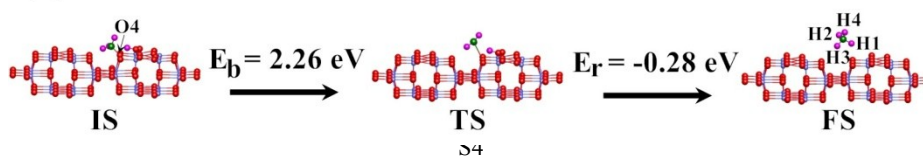

**Figure S4.** Minimum energy pathway (MEP) of CO<sub>2</sub> reduction to CH<sub>4</sub> on anatase TiO<sub>2</sub> {010} facet and each steps are shown by a-h. E<sub>b</sub> and E<sub>r</sub> stand for the activation energy barrier and reaction energy, respectively. The red, royal blue, green and purple balls are behalf of oxygen, titanium, carbon and hydrogen atoms, respectively. All the lengths are given in Å. It needs to explain that the fourth step is just an endothermic process and requires energy 0.45 eV at least to overcome.

(a) 1H

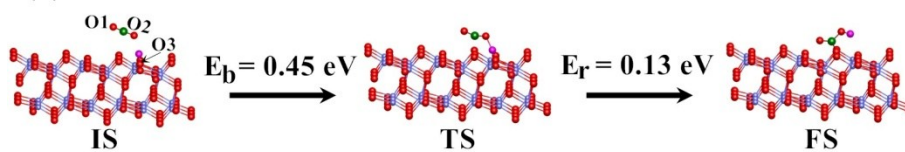

(b) 2H

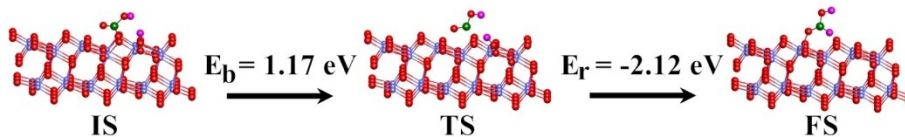

(c) 3H

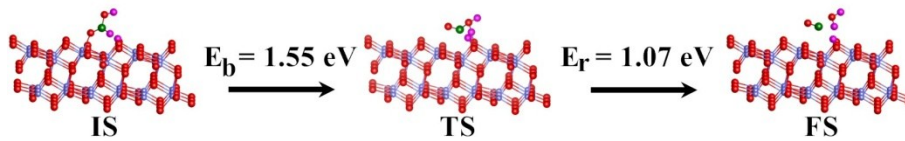

(d) 4H

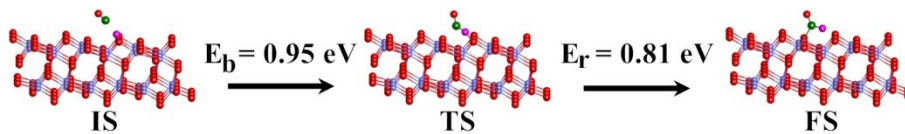

(e) 5H

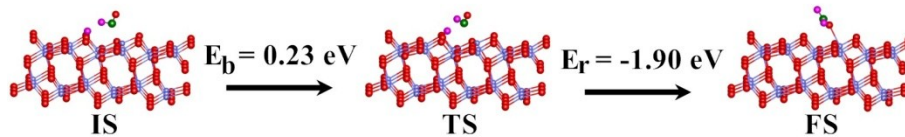

(f) 6H

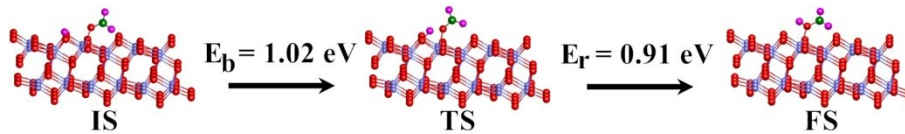

(g) 7H

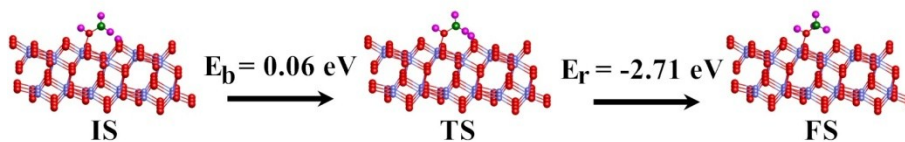

(h) 8H

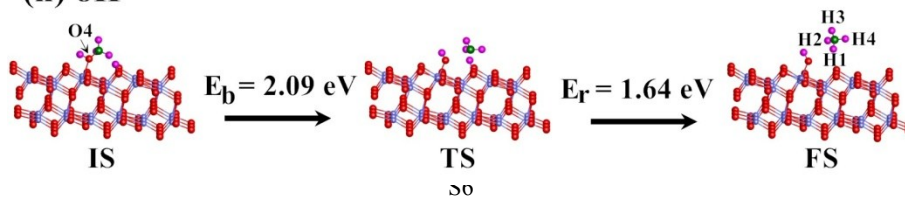

**Figure S5.** Minimum energy pathway (MEP) of CO<sub>2</sub> reduction to CH<sub>4</sub> on anatase TiO<sub>2</sub> {101} facet and each steps are shown by a-h. E<sub>b</sub> and E<sub>r</sub> stand for the activation energy barrier and reaction energy, respectively. The red, royal blue, green and purple balls are behalf of oxygen, titanium, carbon and hydrogen atoms, respectively. All the lengths are given in Å.

**Table S2** Summary of charge transfer of IS and TS for the 1H step on anatase TiO<sub>2</sub> {010} and {101} photocatalysts.

| structures   | Populated electrons/ $\Delta q$ , e |       |       |       |
|--------------|-------------------------------------|-------|-------|-------|
|              | {010}                               |       | {101} |       |
| Config.      | IS                                  | TS    | IS    | TS    |
| Atom species |                                     |       |       |       |
| H            | 0.68                                | 0.21  | 0.73  | 0.66  |
| C            | 2.07                                | 1.52  | 2.11  | 2.07  |
| O1           | -1.01                               | -0.95 | -1.01 | -1.03 |
| O2           | -1.05                               | -1.08 | -1.08 | -1.10 |
| O3           | -1.23                               | -0.95 | -1.37 | -1.30 |



**Table S3** Summary of charge transfer of IS and TS for the 8H step on anatase TiO<sub>2</sub> {010} and {101} facets.

| Populated electrons/ $\Delta q$ , e |       |       |       |       |
|-------------------------------------|-------|-------|-------|-------|
| structures                          | {010} |       | {101} |       |
| Config.                             | IS    | TS    | IS    | TS    |
| Atom species                        |       |       |       |       |
| H1                                  | 0.62  | 0.61  | 0.72  | 0.20  |
| H2                                  | 0.12  | 0.17  | 0.06  | 0.12  |
| H3                                  | 0.16  | 0.17  | 0.10  | 0.06  |
| H4                                  | 0.08  | 0.07  | 0.10  | 0.01  |
| C                                   | 0.24  | -0.28 | 0.31  | -0.18 |
| O4                                  | -1.11 | -1.01 | -1.19 | -1.03 |
